# Supplementary material for: Causal analysis of fetal death in high-risk pregnancies
Source: publisher site journal article supplement (doi:10.1515/jpm-2020-0352), 2021-03-18
Supplement: Supplementary file 1 [file j_jpm-2020-0352_suppl.docx]

TABLE S1 Primers used for pathogen detection.

| Target | Primer sequence (5´- 3´) | Alignment temperature (ºC) | Source |
| --- | --- | --- | --- |
| *Universal 16S rRNA* | F: GCC CAG ACT CCT ACG GG  R: CTT CAC ACA CGC GGC ATG | 56 | This study |
| *Staphylococcus aureus* | F: GCCAGGCTTGTTGTTGTCTT  R: GCTCAAGCACCAAAAGAGGA | 55 | This study |
| *Streptococcus agalactiae* | F: TGTTCAGTGGGAAGAAATGAAA  R: TGTCCCCACTGTGACAAAAA | 55 | This study |
| *Klebsiella pneumoniae* | F: AGGAGCTGCTCTTTCATTTTT  R: TATTGAGCATAGCGACAGCA | 55 | This study |
| *Escherichia coli* | F: ATTGCGATCAGCTCTTTTGC  R: TTTCCGCTCAGAGTTCCAAG | 55 | This study |
| *Ureaplasma urealyticum* | F: TGCTGCACTTACATCAGTTGAA  R: TTCATTAGGTTTTGGTTCACGA | 55 | This study |
| *Chlamydia trachomatis* | F: ATGCTGCTTACATGGCATTG  R: CCACTGGTGGCTCCTAATGT | 55 | This study |
| *Mycoplasma genitalium* | F: CACGGGATTAAATGGTCCAA  R: CCCGAATAAGGAACAACGAA | 55 | This study |
| *Listeria monocytogenes* | F: TTCCAGATTTTTCGGCAAAG  R: TGCAGGAGGATTTTCTGCAT | 55 | This study |
| Panfungi 18S rRNA | F: ATTGGAGGGCAAGTCTGG  R: CCGATCCCTAGTCGGCATAG | 58 | (3) |
| Cytomegalovirus | F: TCGCGCCCGAAGAGG  R: CGGCCGGATTGTGGATT | 55 | (4) |
| Parvovirus B19 | F: TGATTGTGAAACGGATGGAT  R: TTCCTGAAAGCAGATCGAAA | 48 | This study |
| *Herpes simplex virus (1 / 2)* | F: CGCATCAAGACCACCTCCTC  R: GTCAGCTCGTGRTTCTG | 48 | (4) |
| *Respiratory Syncytial Virus* | F: TGCAACAAGCCAGATCAAGA  R: TGGAGAAGCTGATTCCAAGC | 55 | This study |
